# Supplementary material
Source: PubMed Central journal article supplement (PMC5132626)
Supplement: NIHMS6330-supplement-3.pdf [file NIHMS6330-supplement-3.pdf]

(\*PART I: FLAT VELOCITY PROFILE \*)

```
n[t] /. DSolve[{n''[t] + n'[t] / t + λ n[t] == 0}, n, t][[1]]
```

```
BesselJ[0, t √λ] C[1] + BesselY[0, t √λ] C[2]
```

(\* BesselY[0, t √λ] diverges at t=0,

therefore the unnormalized eigenfunction is BesselJ[0, t √λ] \*)

(\*finding the eigenvalues from the boundary condition;  
eigenvalues scale like (Pi\*i)<sup>2</sup> \*)

```
d = Table[BesselJZero[0, k], {k, 1., 500}];
```

```
Show[ListPlot[d], Plot[Pi x, {x, 0, 500}, PlotStyle -> Red]]
```

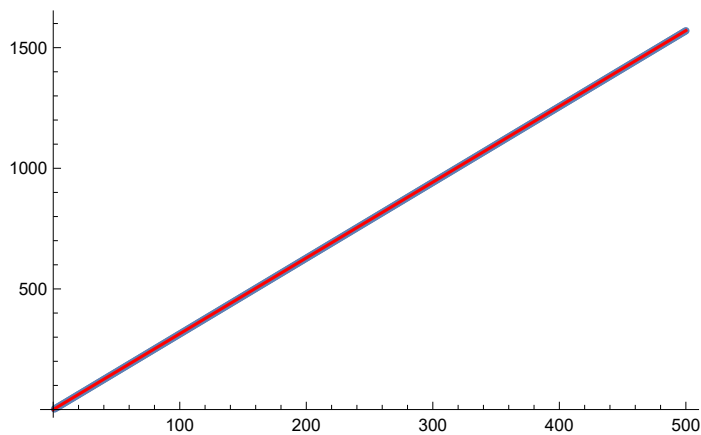

(\*eigenfunction normalization \*)

```
Integrate[BesselJ[0, a t]2 t, {t, 0, 1}]
```

$$\frac{1}{2} (\text{BesselJ}[0, a]^2 + \text{BesselJ}[1, a]^2)$$

```
norm = Table[Sqrt[ $\frac{1}{2} (\text{BesselJ}[0, a]^2 + \text{BesselJ}[1, a]^2)$ ], {a, d}];
```

(\*finding a<sub>i</sub>'s\*)

```
Simplify[Integrate[BesselJ[0, a t] t, {t, 0, 1}]]
```

$$\frac{\text{BesselJ}[1, a]}{a}$$

```
aiunnorm = Table[ $\frac{\text{BesselJ}[1, a]}{a}$ , {a, d}];
```

```
ai = aiunnorm / norm;
```

(\* finding derivative at the boundary \*)

```

D[BesselJ[0, a t], t]
-a BesselJ[1, a t]

deriv = Table[-a BesselJ[1, a], {a, d}] / norm;

(*calculating bi's; factor 2 is from the factor 1/(\int_0^1 t dt)*)

bi = -2 ai deriv / d2 ;

Simplify[
$$-\frac{\text{BesselJ}[1, a]}{a} (-a \text{BesselJ}[1, a]) / \left( \frac{1}{2} (\text{BesselJ}[0, a]^2 + \text{BesselJ}[1, a]^2) \right)$$
]


$$\frac{2 \text{BesselJ}[1, a]^2}{\text{BesselJ}[0, a]^2 + \text{BesselJ}[1, a]^2}$$


(*  $\frac{2 \text{BesselJ}[1, a]^2}{\text{BesselJ}[0, a]^2 + \text{BesselJ}[1, a]^2} = 2$  for a=d; b= 4/d2 *)

(*checking the asymptotic scaling *)

Show[ListLogLogPlot[bi],
LogLogPlot[4. / Pi2 n-2., {n, 1, 500}, PlotStyle → Red], PlotRange → All]

```

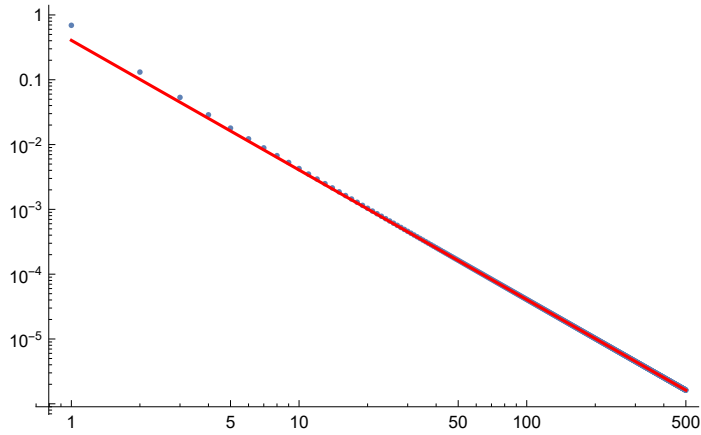

```

(*calculating the sequestration probability *)

ratio[z_] = Total[(1 - Exp[-d2 / z]) bi];

Remainder[x_] := Sum[0.4 n-2 · (1 - Exp[-(Pi n)2]), {n, 501, 1 000 000}];

(*sinusoid data for F*)

F = {1, 3, 6, 9}
{1, 3, 6, 9}

ratio[F] + Remainder[F]
{0.997859, 0.899362, 0.73536, 0.631763}

(*artery data *)

```

**F = {18 431, 55 293, 110 585, 165 878}**

{18 431, 55 293, 110 585, 165 878}

**ratio[F] + Remainder[F]**

{0.0165574, 0.00956786, 0.00676595, 0.00552364}

**(\*vein data \*)**

**F = {165 361, 496 083, 992 165, 1 488 248}**

{165 361, 496 083, 992 165, 1 488 248}

**ratio[F] + Remainder[F]**

{0.00553227, 0.00319118, 0.00226235, 0.00186529}

**(\*PARABOLIC FLOW PROFILE \*)**

**(\*finding the eigenvalues \*)**

**Simplify[n[t] /. DSolve[{n''[t] + n'[t] / t + λ (1 - t<sup>2</sup>) n[t] == 0}, n, t][[1]],  
Assumptions → t > 0]**

$\sqrt{2} e^{-\frac{1}{2}t^2\sqrt{\lambda}}$

$\left( C[1] \text{HypergeometricU}\left[\frac{1}{4}(2 - \sqrt{\lambda}), 1, t^2\sqrt{\lambda}\right] + C[2] \text{LaguerreL}\left[\frac{1}{4}(-2 + \sqrt{\lambda}), t^2\sqrt{\lambda}\right] \right)$

**(\* HypergeometricU[ $\frac{1}{4}(2 - \sqrt{\lambda}), 1, t^2\sqrt{\lambda}$ ] diverges at t=0 \*)**

**(\*finding the eigenvalues from the boundary condition a= $\sqrt{\lambda}$  \*)**

**d = Table[**

**$\left( a /. \text{FindRoot}\left[\text{LaguerreL}\left[\frac{1}{4}(-2 + a), a\right] == 0, \{a, 2.7 + 4n\}\right][[1]] \right), \{n, 0, 120, 1\};$**

**(\*checking the eigenvalue scaling with i \*)**

```
Show[ListPlot[d], Plot[4 i, {i, 0, 120}, PlotStyle -> Red]]
```

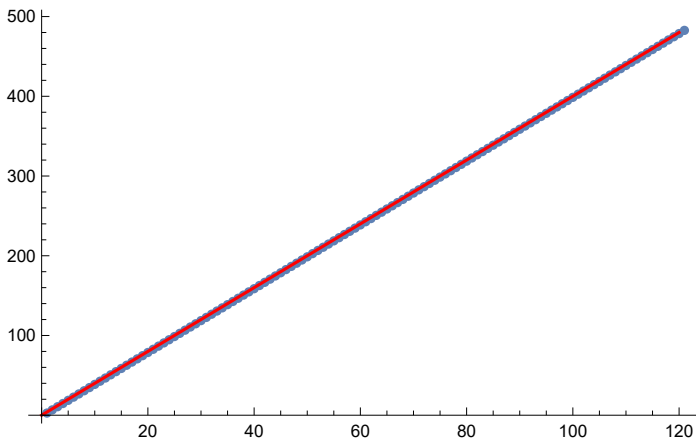

```
(*normalization constant for the eigenfunctions *)
```

```
norm = Table[
  Sqrt[NIntegrate[LaguerreL[1/4 (-2 + a), a t^2]^2 e^{-a t^2} t (1 - t^2), {t, 0, 1}], {a, d}];
```

```
(* calculating the a_i 's *)
```

```
ai = Table[
  NIntegrate[LaguerreL[1/4 (-2 + a), a t^2] e^{-a t^2/2} t (1 - t^2), {t, 0, 1}], {a, d}]/norm;
```

```
(*calculating the derivative term at the boundary
```

```
Simplify[D[LaguerreL[1/4 (-2 + a), a t^2] e^{-a t^2/2}, t]]
-a e^{-a t^2/2} t (LaguerreL[1/4 (-2 + a), a t^2] + 2 LaguerreL[1/4 (-6 + a), 1, a t^2])
```

```
deriv = Table[
  -a e^{-a/2} (LaguerreL[1/4 (-2 + a), a] + 2 LaguerreL[1/4 (-6 + a), 1, a]), {a, d}]/norm;
```

```
(* defining b_i 's *)
```

```
bi = -4 ai / d^2 deriv;
```

```
(*checking scaling for b_i *)
```

```
Show[ListLogLogPlot[bi], LogLogPlot[0.39/n2.38, {n, 1, 120}, PlotStyle → Red]]
```

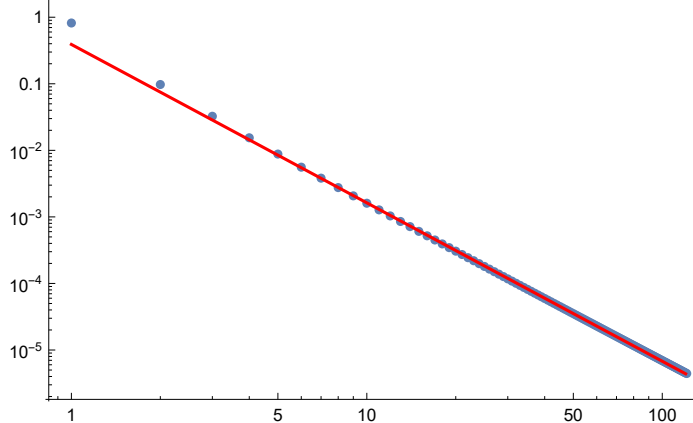

```
(*calculating the sequestration probability *)
```

```
ratio[z_] = Total[(1 - Exp[-d2/z]) bi];
```

```
remainder[x_] := Sum[0.39/n2.38 (1 - Exp[-(4n)2/x]), {n, 121, 1000000}];
```

```
(*factor 3/2 comes from conversion of the mean to maximal flow velocity *)
```

```
(*sinusoid data for F*)
```

```
F = {1, 3, 6, 9} 3/2
```

```
{ $\frac{3}{2}$ ,  $\frac{9}{2}$ , 9,  $\frac{27}{2}$ }
```

```
ratio[F] + remainder[F]
```

```
{0.993722, 0.838724, 0.635877, 0.519916}
```

```
(*arterial data *)
```

```
F = {18431, 55293, 110585, 165878} 3/2
```

```
{ $\frac{55293}{2}$ ,  $\frac{165879}{2}$ ,  $\frac{331755}{2}$ , 248817}
```

```
ratio[F] + remainder[F]
```

```
{0.00433476, 0.00208179, 0.00130509, 0.000991623}
```

```
(* vein data *)
```

```
F = {165361, 496083, 992165, 1488248} 3/2
```

```
{ $\frac{496083}{2}$ ,  $\frac{1488249}{2}$ ,  $\frac{2976495}{2}$ , 2232372}
```

```
ratio[F] + remainder[F]
```

```
{0.000993726, 0.00047012, 0.000292558, 0.000221568}
```
